# Supplementary material for: U.S. winter wheat yield loss attributed to compound hot-dry-windy events
Source: PubMed Central journal article supplement (PMC9700680; doi:10.1038/s41467-022-34947-6), 2022-11-24
Supplement: 41467_2022_34947_MOESM1_ESM.pdf [file 41467_2022_34947_MOESM1_ESM.pdf]

1 **Supplementary Information**

2 **U.S. winter wheat yield loss attributed to compound hot-dry-windy events**

3  
4 Haidong Zhao<sup>1</sup>, Lina Zhang<sup>2</sup>, M. B. Kirkham<sup>1</sup>, Stephen M. Welch<sup>1</sup>, John W. Nielsen-  
5 Gammon<sup>3</sup>, Guihua Bai<sup>4</sup>, Jiebo Luo<sup>5</sup>, Daniel A. Andresen<sup>6</sup>, Charles W. Rice<sup>1</sup>, Nenghan Wan<sup>1</sup>,  
6 Romulo P. Lollato<sup>1</sup>, Dianfeng Zheng<sup>7</sup>, Prasanna H. Gowda<sup>8</sup>, Xiaomao Lin<sup>1,2\*</sup>

7  
8 <sup>1</sup>Department of Agronomy, Kansas State University, 2004 Throckmorton Hall, Plant Sciences  
9 Center, Manhattan, KS 66506, USA

10 <sup>2</sup>Kansas Climate Center, Kansas State University, 2108 Throckmorton Hall, Plant Sciences  
11 Center, Manhattan, KS 66506, USA

12 <sup>3</sup>Department of Atmospheric Sciences, Texas A&M University, College Station, TX 77843,  
13 USA

14 <sup>4</sup>Hard Winter Wheat Genetics Research Unit, USDA–ARS, Kansas State University,  
15 Manhattan, KS 66506, USA

16 <sup>5</sup>Department of Computer Science, University of Rochester, Rochester, NY 14627, USA

17 <sup>6</sup>Department of Computer Science, Kansas State University, Manhattan, KS 66506, USA

18 <sup>7</sup>College of Coastal Agriculture Sciences, Guangdong Ocean University, Zhanjiang,  
19 Guangdong 524088, China

20 <sup>8</sup>USDA, Agricultural Research Service, Southeast Area, Stoneville, MS 38776, USA

21  
22 **\*Corresponding author:** Xiaomao Lin ([xlin@ksu.edu](mailto:xlin@ksu.edu))

23

|    |                                                                                          |    |
|----|------------------------------------------------------------------------------------------|----|
| 24 | <b>Contents</b>                                                                          |    |
| 25 | <b>Supplementary Text 1. Phenology of winter wheat</b> .....                             | 3  |
| 26 | <b>Supplementary Text 2. HadISD data to identify HDW</b> .....                           | 4  |
| 27 | <b>Supplementary Text 3. Intercomparison between ERA5-Land and HadISD datasets</b> ..... | 5  |
| 28 | <b>Supplementary Text 4. Additional statistical models tested</b> .....                  | 5  |
| 29 | <b>Supplementary Figures (12)</b> .....                                                  | 7  |
| 30 | <b>Supplementary Tables (5)</b> .....                                                    | 19 |
| 31 |                                                                                          |    |
| 32 |                                                                                          |    |

### 33 **Supplementary Text 1. Phenology of winter wheat**

34 Because weather varies in both space and time, uniform and homogenous responses of crops  
35 to weather during the growing season should not be expected. Thus, phenological dates for  
36 each county-year were estimated separately, which allows us to analyze yield responses  
37 physiologically in terms of climate change and variability that sub-regions (states or counties)  
38 were experiencing in a wheat life cycle (Supplementary Fig. 1). The phenological observations,  
39 including planting and harvest dates, were collected from 230 and 186 experimental stations,  
40 respectively (Supplementary Fig. 2a,d). Each state had more than 12 years of phenological  
41 observations with 15 stations per year on average. To fulfill a complete dataset, we first  
42 interpolated available data to the centroid of each county using a Delaunay Triangulation  
43 method<sup>1</sup>. Due to missing dates, especially in Oklahoma and Texas, we constructed linear  
44 regression models between phenological dates across Kansas (KS) and Nebraska (NE), where  
45 the data were nearly complete, and available phenological dates mostly located in Oklahoma  
46 (OK) and Texas (TX). We evaluated the completeness of our phenological date estimates by a  
47 leave-one-out approach<sup>2</sup>. The selection of the optimum coefficients for each model was based  
48 on the minimum root mean square error (RMSE) between fitted and observed phenological  
49 datasets (Supplementary Table 5). The selected model was then used to gap-fill missing  
50 planting and harvest dates for each county from 1982-2020. An empirical relationship, where  
51 physiological maturity occurred approximately 2 weeks prior to harvest<sup>3</sup>, was used to estimate  
52 maturity dates in our study.

53

54 Growing degree days (GDD, °C days) is a common matrix used to partition phenological  
55 periods of winter wheat in the Great Plains<sup>4</sup>. For example, the jointing and heading dates were  
56 defined as reaching 35% and 57% of accumulated GDD<sup>5</sup> required for winter wheat maturity  
57 from January 1 to the maturity date, respectively<sup>4</sup>. Based on this averaged accumulated GDD,

58 the jointing and heading dates for all counties were estimated. Note that, even though there  
59 were no available documented harvest dates in Texas, the observed heading dates were  
60 collected over 20 years covering three counties including Bushland, Chillicothe, and Dallas in  
61 Texas, which represent three diverse climate sub-regions: Great Plains, North Central Plains,  
62 and Coastal Plains, respectively (Supplementary Fig. 2c). The accumulated GDD from January  
63 1 to the heading dates were used to reversely estimate average accumulated GDD from January  
64 1 to maturity dates across these three counties for each year. We then estimated the maturity  
65 dates in TX. Similar to SD, CO, and OK, the estimated jointing dates and heading dates were  
66 also obtained in TX. Finally, we partitioned the wheat phenology into three stages, including  
67 planting to jointing (PT-JT), jointing to heading (JT-HD), and heading to maturity (HD-MT)  
68 (Supplementary Figs. 1 and 2). All phenological data can be directly obtained from the links  
69 listed in Supplementary Table 1, but KS data from 1982-2007 were from printed documents  
70 that we digitized at the Department of Agronomy and Kansas Climate Center, Kansas State  
71 University.

72

### 73 **Supplementary Text 2. HadISD data to identify HDW**

74 The HadISD is a global sub-daily dataset based on the U.S. Integrated Surface Database (ISD)  
75 from NOAA's National Centers of Environmental Information (NCEI). The dataset covers  
76 1931 to the present and is designed to study the long-term changes of extreme temperature,  
77 pressure, and humidity<sup>6</sup>. The station selection criteria were based on a suite of quality control  
78 tests, and data homogeneity assessments were conducted for air temperature, dew point  
79 temperature, sea-level pressure, and wind speed<sup>6</sup>. We retrieved observed hourly 2-m air  
80 temperature and air relative humidity and 10-m wind speed from 1982 to 2020. We screened  
81 16 stations with less than 5% missing data for all three variables during the grain-filling  
82 periods, except for 4 stations in CO and OK that had less than 10% missing data. We then used

83 the regularized expectation maximization (rEM) procedures to refill data gaps<sup>7</sup>. Finally, we  
84 presented the spatial pattern of HDW (Fig. 1b) based on the HadISD dataset.

85

### 86 **Supplementary Text 3. Intercomparison between ERA5-Land and HadISD datasets**

87 To evaluate HDW variations derived from ERA5-Land datasets in both spatial and temporal  
88 domains, we calculated correlation coefficients between HadISD and ERA5-Land datasets. We  
89 screened 34 stations from HadISD datasets based on our data quality control procedure.  
90 Stations were selected with at least 30 years of data for analysis. A year was treated as missing  
91 in any station if this station contained more than 8% missing hourly data from April 1 to July  
92 31<sup>st</sup> from 1982 to 2020, which generally covered the grain filling period (HD-MT) across our  
93 study domain. Outside of this window there were rare HDW events. Then we trimmed all  
94 ERA5-Land datasets to hourly, in order to match with the HadISD dataset that we selected  
95 (Supplementary Fig. 3). We then counted annual mean HDW events for each station-year by  
96 using HadISD and ERA5-Land datasets. The temporal HDW anomalies, calculated by taking  
97 all of 1982 to 2020 as the base period, were used to get a correlation coefficient between  
98 HadISD and ERA5-Land datasets for each station (Supplementary Fig. 4a). The spatial HDW  
99 anomalies were calculated based on all available stations for a year (Supplementary Fig. 4b).  
100 We found both temporal and spatial correlation coefficients of 0.8 in most stations and years  
101 (Supplementary Fig. 4a,b). Changes of HDW events between the latest 20 years and the early  
102 19 years indicated there were increasing HDW events (Supplementary Fig. 4c), suggesting not  
103 only an increasing trend of HDW events in both datasets but also changes in magnitudes that  
104 were consistent in both datasets.

105

### 106 **Supplementary Text 4. Additional statistical models tested**

107 To increase the confidence of HDW influence on wheat yields, we used both the quadratic

108 temperature model (M1, Eq. S1) and the temperature bins' model (M2, Eq. S2), which are  
 109 temperature orientated. Note that we did not include EDD and FDD when considering  
 110 temperature as a predictor because the quadratic temperature and temperature bins have  
 111 captured the extreme heat (EDD) and the extreme cold (FDD) effects<sup>8</sup>. Both the M1 and M2  
 112 structures are shown following:

$$113 \quad Y_{i,t} = \sum_{p=1}^3 (\beta_{1,p} T_{i,p,t} + \beta_{2,p} T_{i,p,t}^2) + \sum_{p=1}^3 (\beta_{3,p} Prcp_{i,p,t} + \beta_{4,p} Prcp_{i,p,t}^2) + \beta_5 HDW_{i,t} + c_i + y_t + \varepsilon_{i,t} \quad [M1, Eq. S1]$$

$$114 \quad Y_{i,t} = \sum_{p=1}^3 \int_h^{\bar{h}} g_p(h) \phi_{i,p,t}(h) dh + \sum_{p=1}^3 (\beta_{1,p} Prcp_{i,p,t} + \beta_{2,p} Prcp_{i,p,t}^2) + \beta_3 HDW_{i,t} + c_i + y_t + \varepsilon_{i,t} \quad [M2, Eq. S2]$$

115 where  $T$  refers to mean temperature during specific phenological stage. The observed  
 116 temperatures ( $h$ ) during each time period range between the lower bound  $h$  and the upper bound  
 117  $\bar{h}$ . The  $g(h)$  is the fixed coefficient function for the temperature exposure,  $h$ , on yield. The  
 118  $\phi_{i,p,t}(h)$  is the time distribution given the hours of exposure to temperature  $h$ . Other factors are  
 119 the same using model Eqs. 1 and 2 as in the Method section of Main text. We here used  
 120 temperature bins of 2°C interval during three phenological stages.

121

122 **Supplementary Figures (12)**

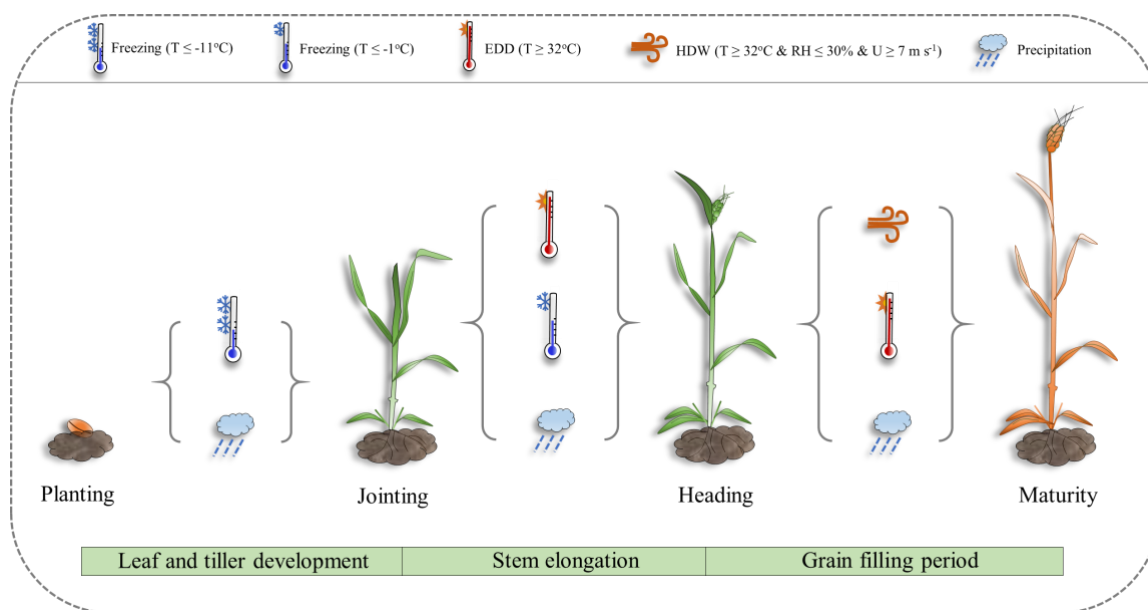

123 **Supplementary Figure 1. Flowchart of main climate indices throughout three**  
 124 **phenological stages in winter wheat.** The thresholds selected (at the top) and three  
 125 phenological stages (at the bottom) were used in our modeling process (at the middle, for  
 126 example, we used EDD (extreme degree days), Freezing at  $T \leq -1^\circ\text{C}$ , and precipitation during  
 127 the jointing to heading stage. The planting-jointing (PT-JT), jointing-heading (JT-HD), and  
 128 heading-maturity (HD-MT) stages were included during modeling.  
 129

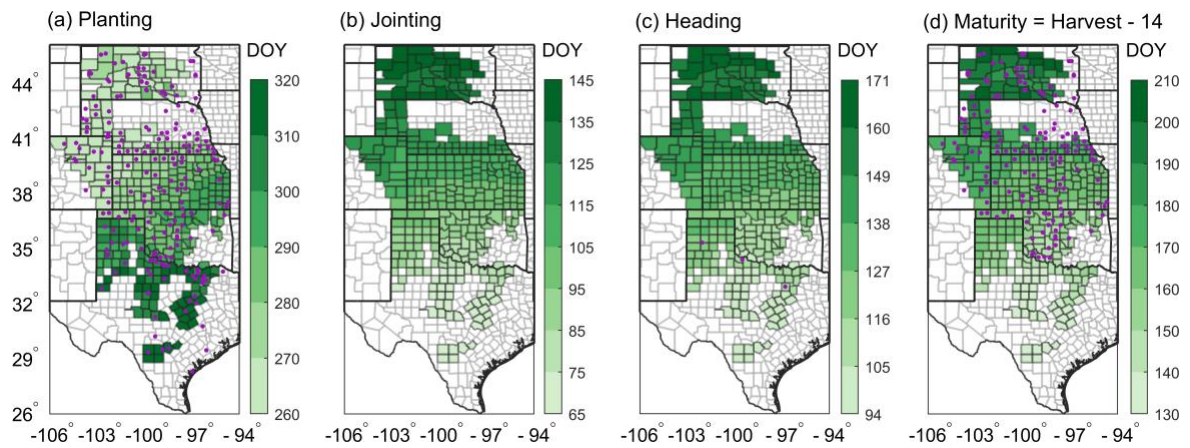

130 **Supplementary Figure 2. Average phenology (days of year, DOY) estimated from 1982-**  
 131 **2020.** The estimated county-level phenology included **(a)** planting, **(b)** jointing, **(c)** heading,  
 132 and **(d)** maturity dates. The purple dots in **(a)**, **(c)**, and **(d)** indicate the 230, 3, and 186 field  
 133 experiment stations respectively, where planting, heading, and harvest dates were documented  
 134 by observations (details in Supplementary Text 1).

135

136



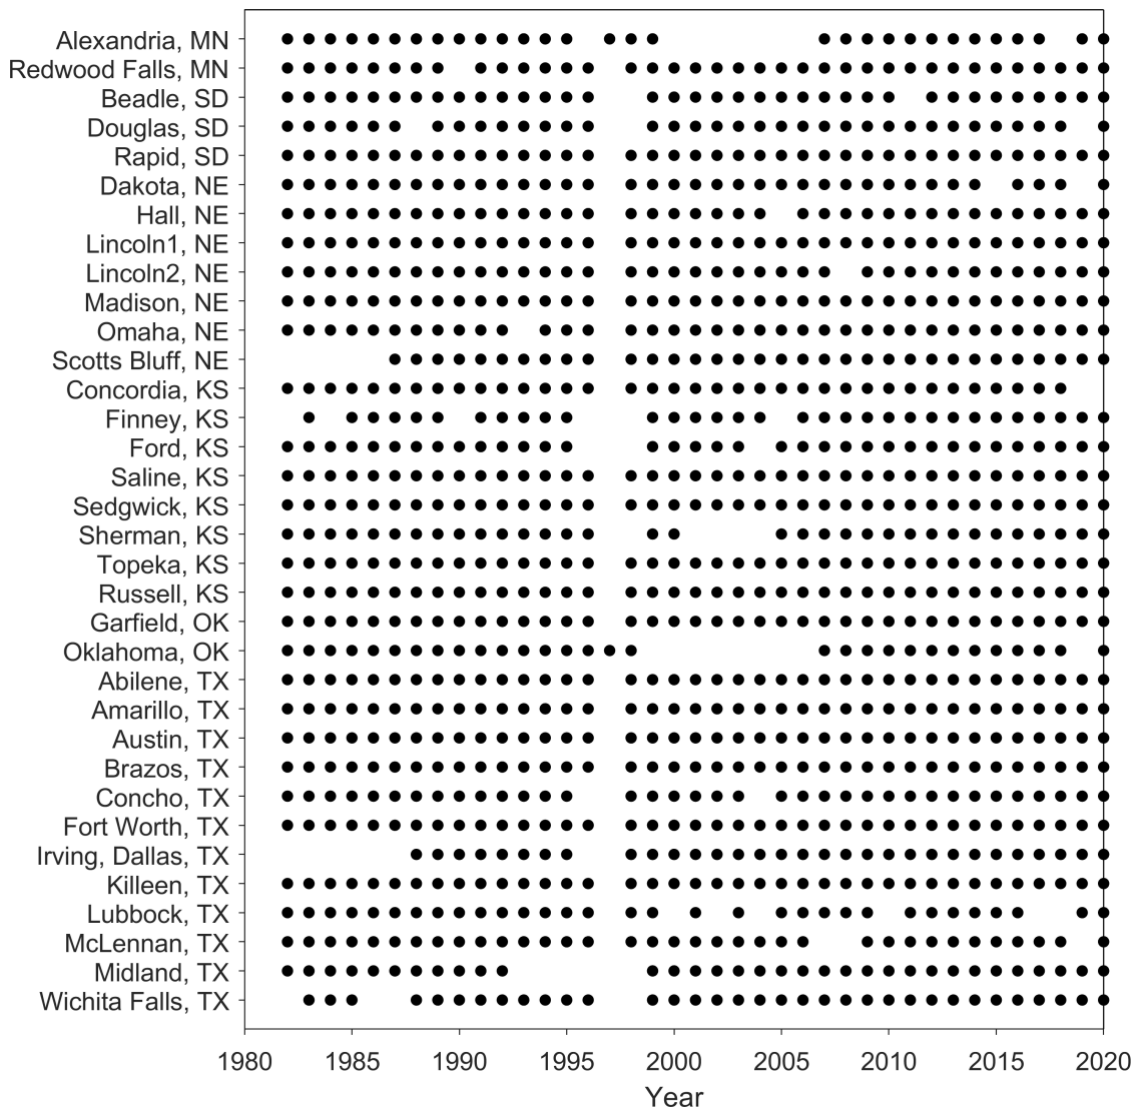

137 **Supplementary Figure 3. Available stations and years (trimmed from April 1 to July 31**  
 138 **only) for hourly temperature, relative humidity (dew point temperatures), and wind**  
 139 **speeds. The dots represent observations available in years.**

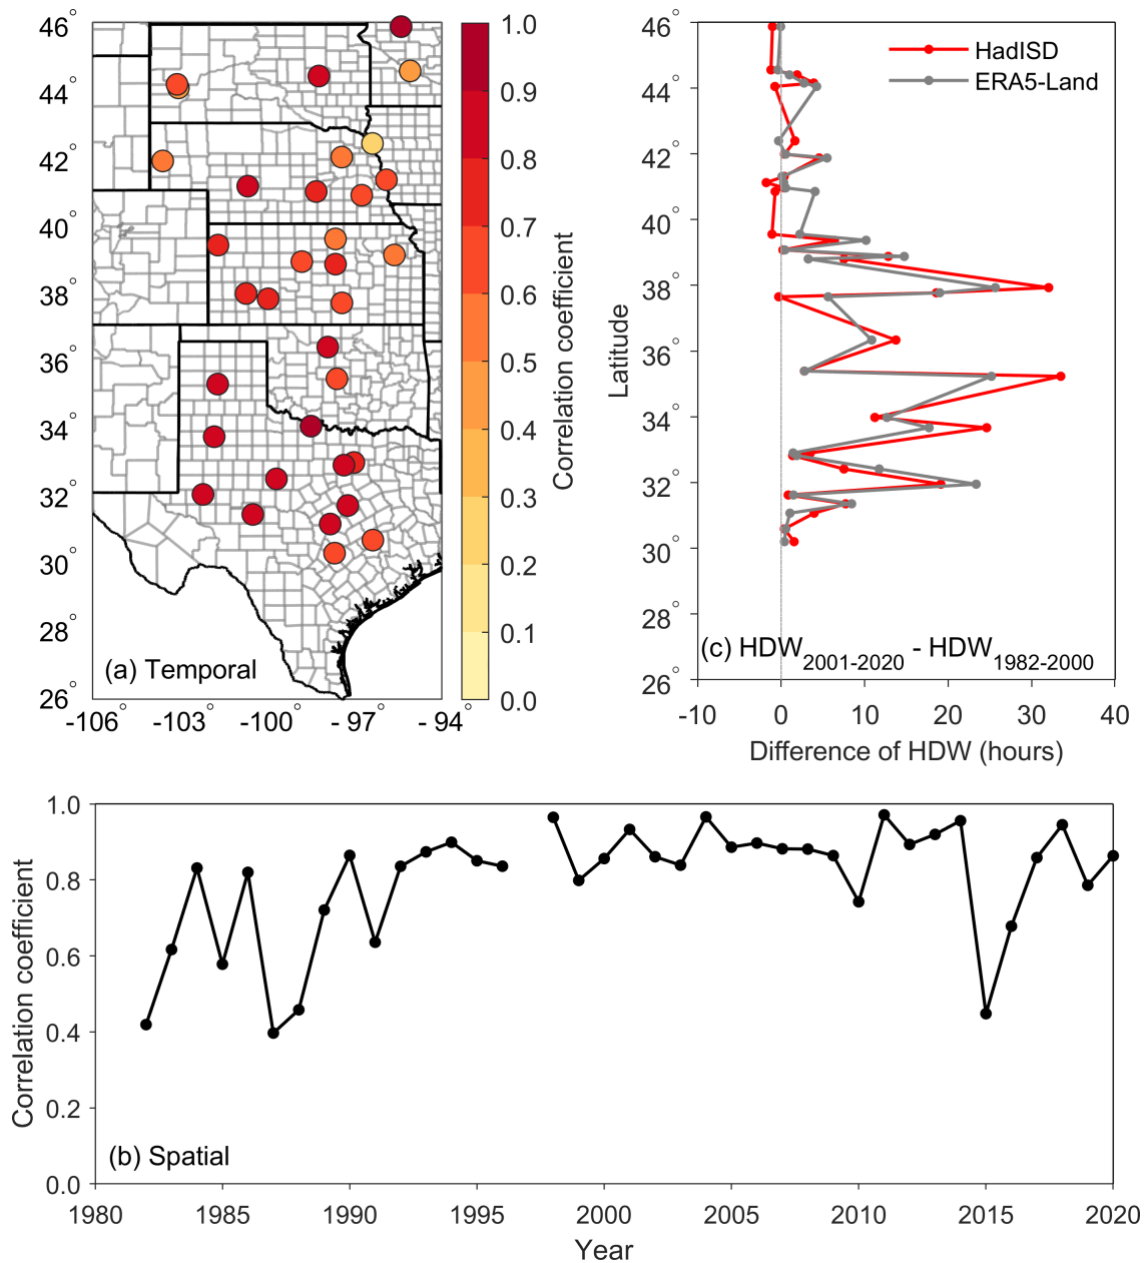

140 **Supplementary Figure 4. The 34-station (a) temporal and (b) 39-year spatial correlation**  
 141 **coefficients as well as (c) difference of averaged hot-dry-windy (HDW) events for the**  
 142 **latest 20 years (2001-2020) and the earliest 19 years (1982-2000).** All correlations calculated  
 143 were based on either a temporal anomaly (average of available years as a base for a station) or  
 144 a spatial anomaly (average of all available stations as a base for a year) from HadISD stations  
 145 and ERA5-Land datasets.

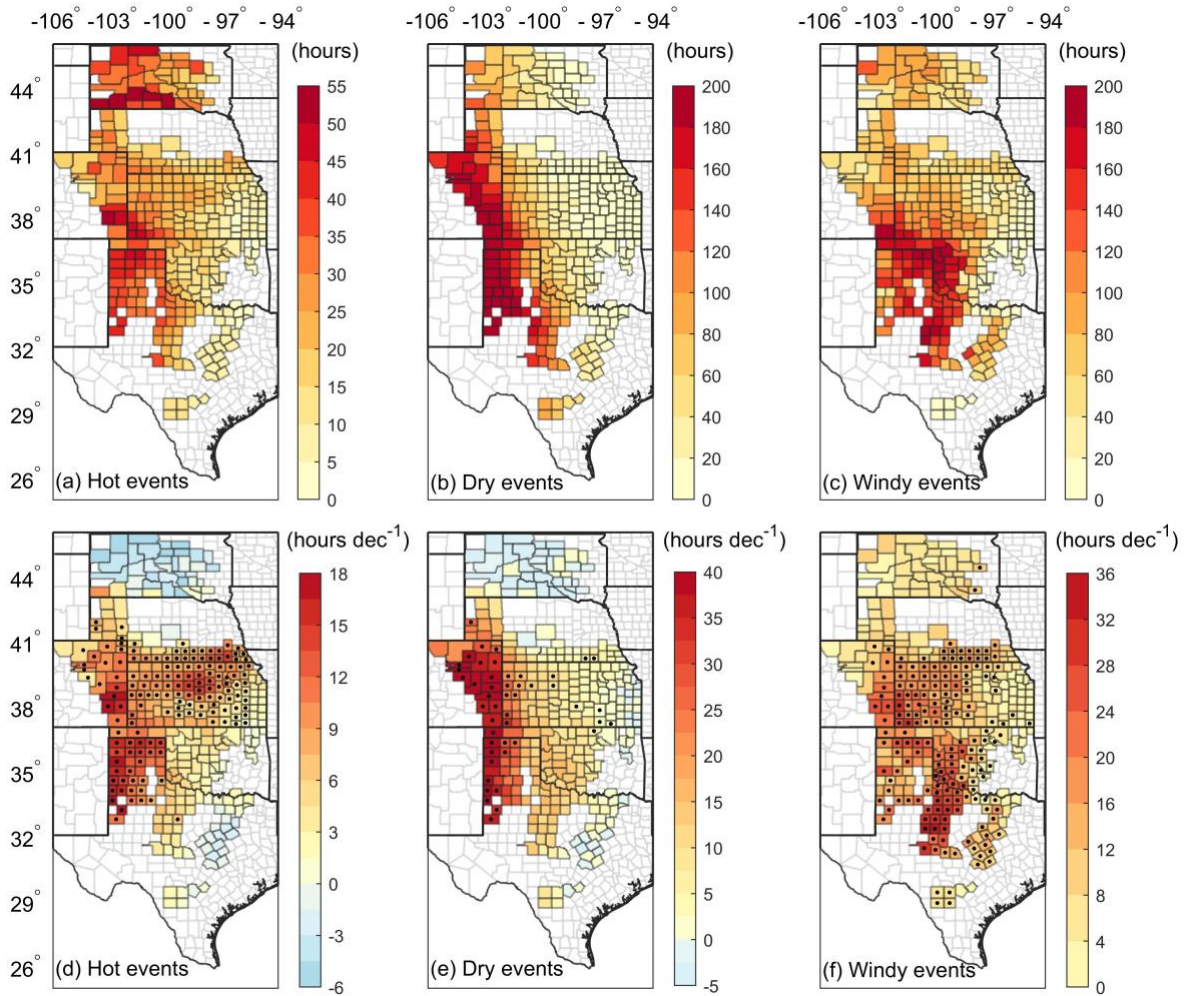

146 **Supplementary Figure 5. Annual mean (a-c) and trends (d-f) of three individual climate**  
 147 **extreme events during the heading-maturity (HD-MT) stage from 1982 to 2020.** The  
 148 annual mean of (a) hourly hot ( $T \geq 32^\circ\text{C}$ ), (b) dry ( $\text{RH} \leq 30\%$ ), and (c) windy ( $U \geq 7 \text{ m s}^{-1}$ )  
 149 events during HD-MT. The black dots indicate statistically significant trends at a 95%  
 150 confidence interval based on the Mann-Kendall test ( $p \leq 0.05$ ).  
 151

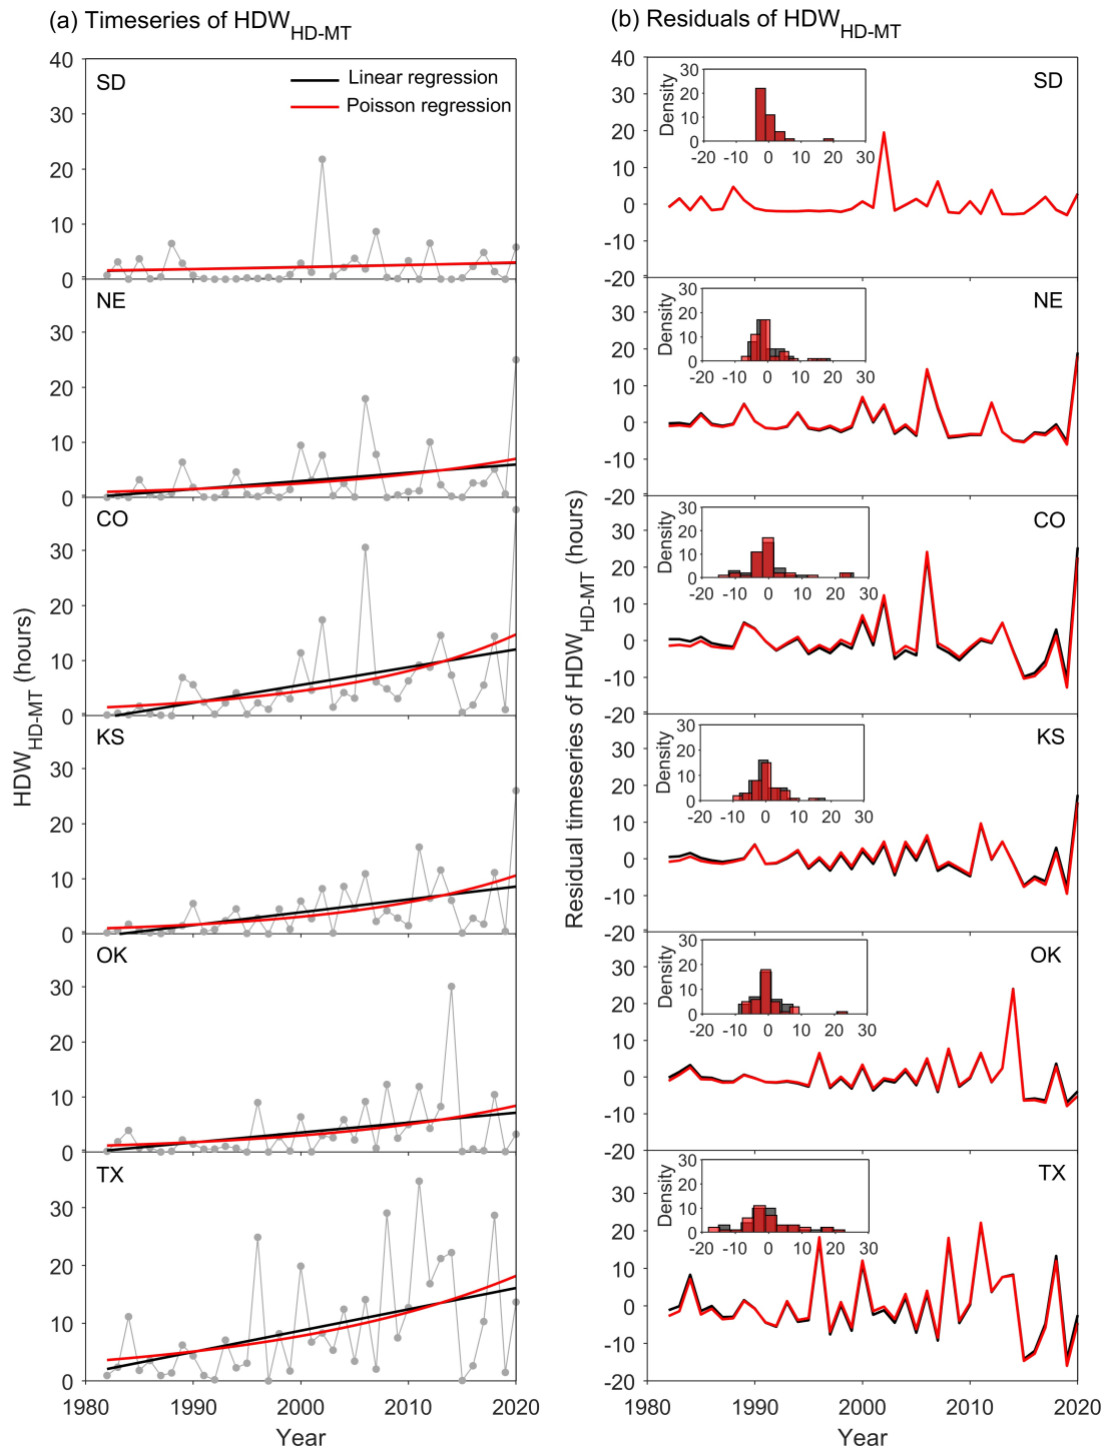

152 **Supplementary Figure 6. Statewide hot-dry-windy (HDW) trends during the heading-**  
 153 **maturity ( $HDW_{HD-MT}$ ) stage when area-weighted averages were conducted from 1982 to**  
 154 **2020. a,** Trends of  $HDW_{HD-MT}$  detected by ordinary linear regression and Poisson regression,  
 155 which should not be extrapolated because trend analyses (including other methods not used  
 156 here), on average, best represent an approximation. **b,** residuals and their histograms.  
 157

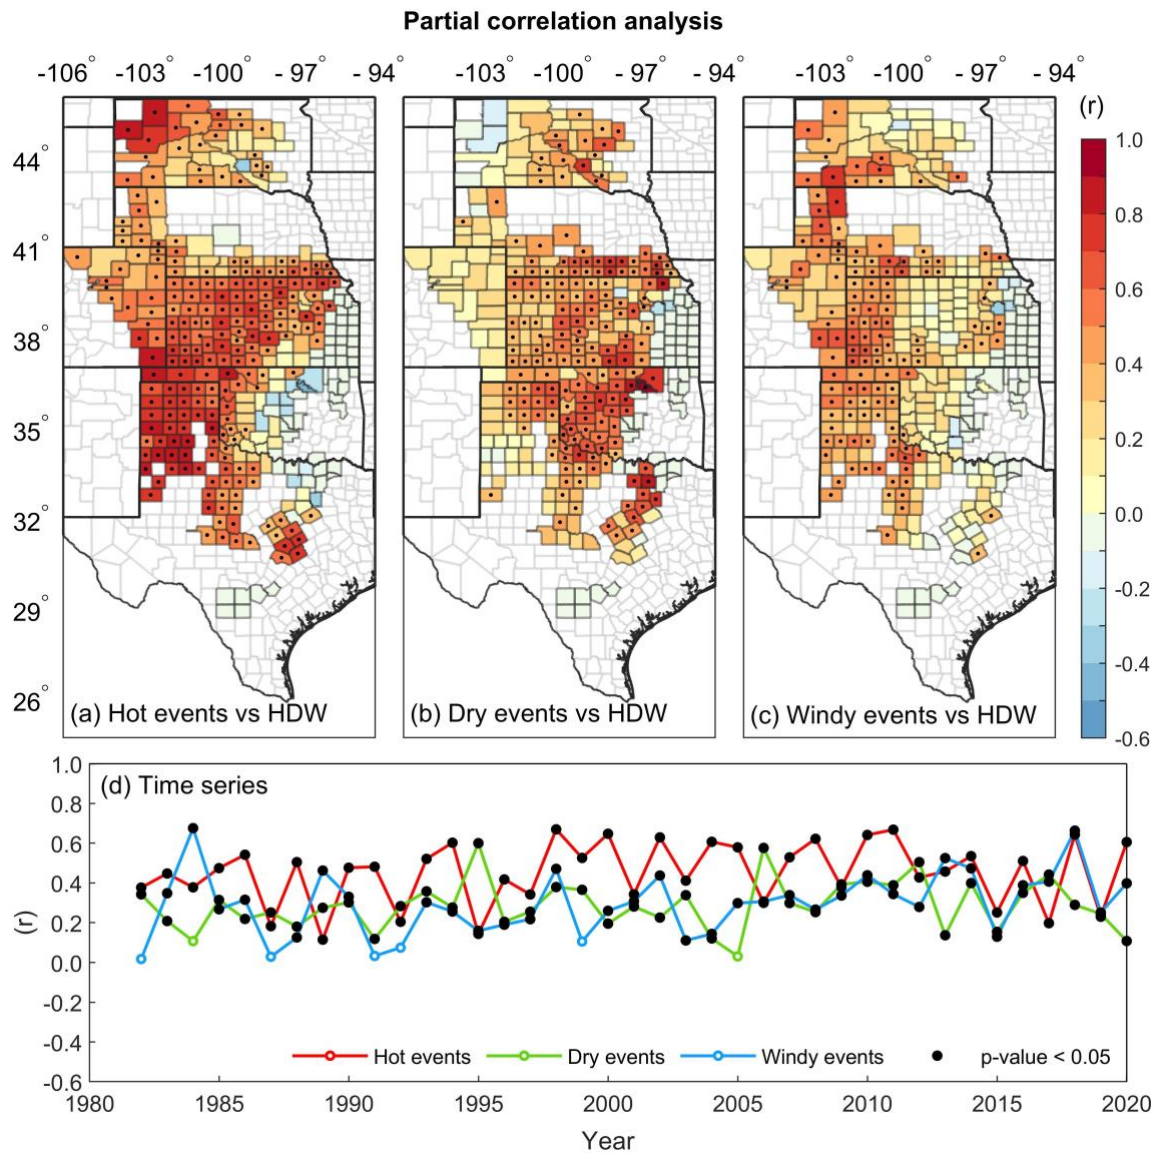

158 **Supplementary Figure 7. Spatial (a-c) and temporal (d) patterns of partial correlation**  
 159 **coefficients between three individual events and HDW during the heading-maturity (HD-**  
 160 **MT) stage from 1982 to 2020. The black dots represent the statistically significant correlation**  
 161 **years ( $p \leq 0.05$ ).**

162  
 163

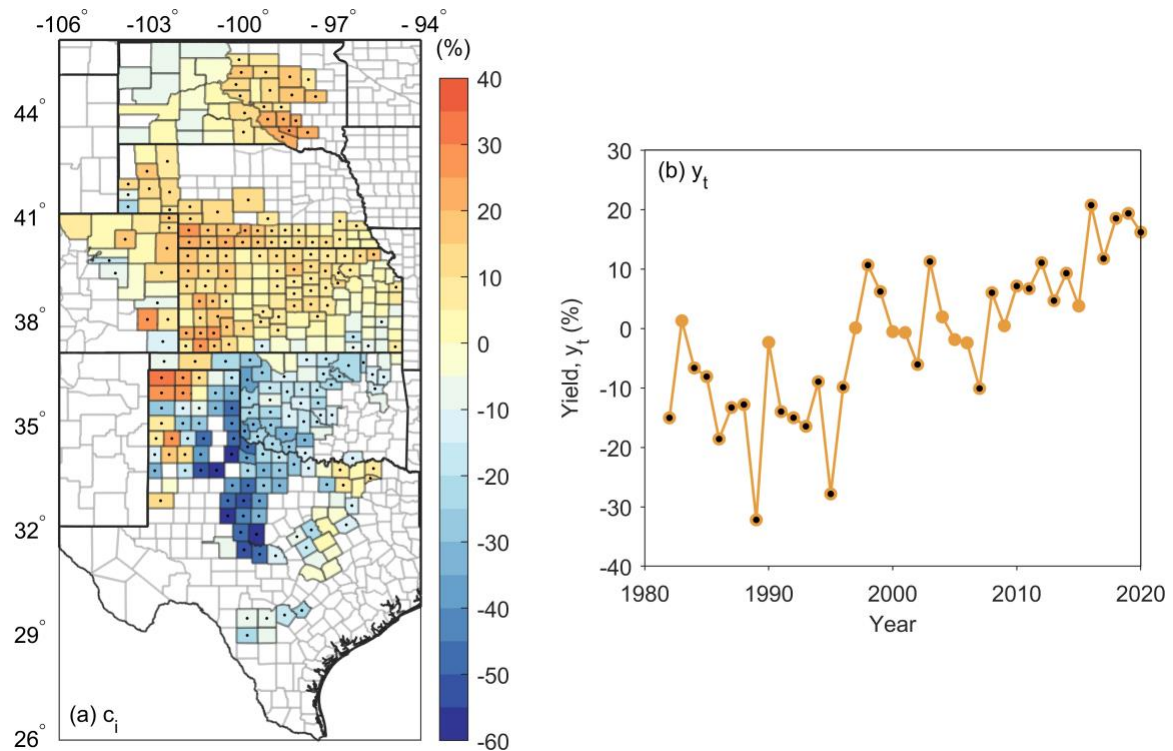

164 **Supplementary Figure 8. The random effect of counties and years derived from the linear**  
 165 **mixed-effects model relative to averaged yields (%).** **a**,  $c_i$  term in Eq. (1). The color bar  
 166 shows the effect sizes. **b**,  $y_t$  term in Eq. (1) showing a general upward trend whose overall  
 167 magnitude is consistent with the rates of wheat breeding progress and improvements in  
 168 agronomic production practices. The black dots indicate statistical significance in the model ( $p$   
 169  $\leq 0.05$ ).  
 170

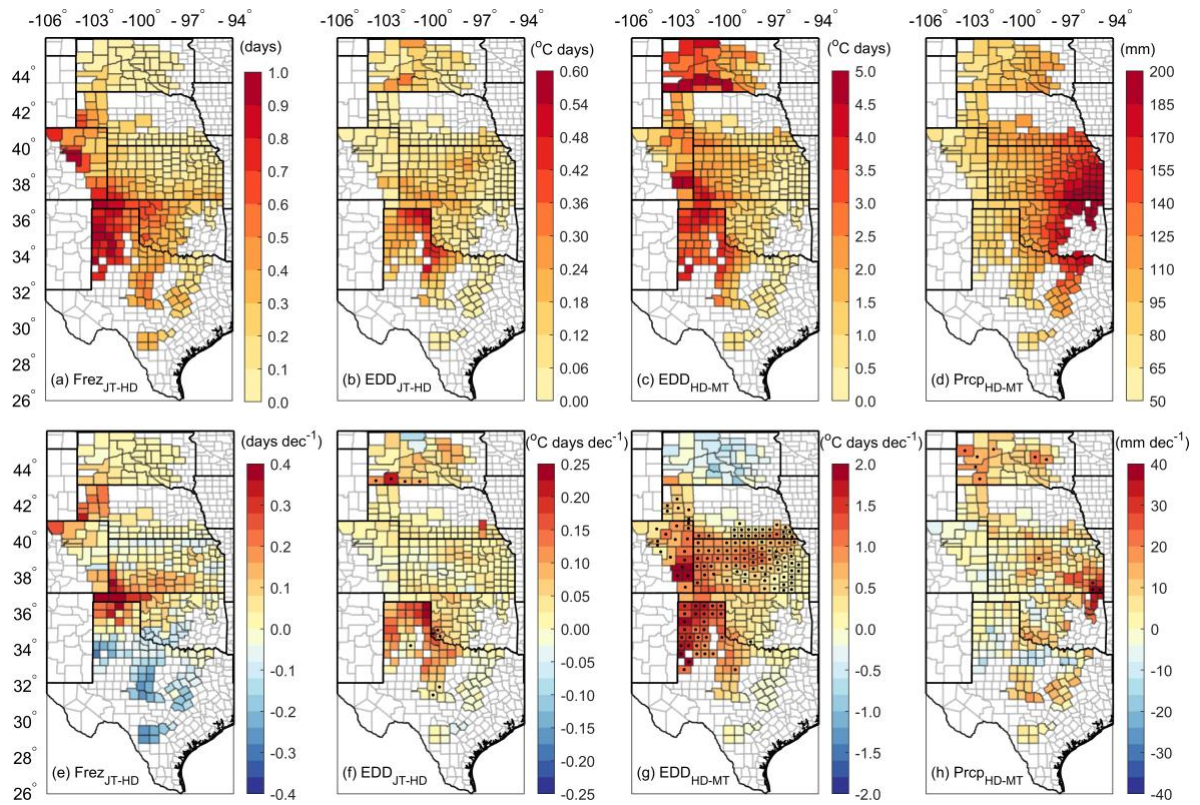

171 **Supplementary Figure 9. Annual mean (a-d) and trends (e-h) of climate indices from 1982**  
 172 **to 2020.** The black dots in (e-h) represent trends that were statistically significant in these  
 173 counties ( $p \leq 0.05$ ).  
 174

175

176

177

178

179

180

181

182

183

184

185

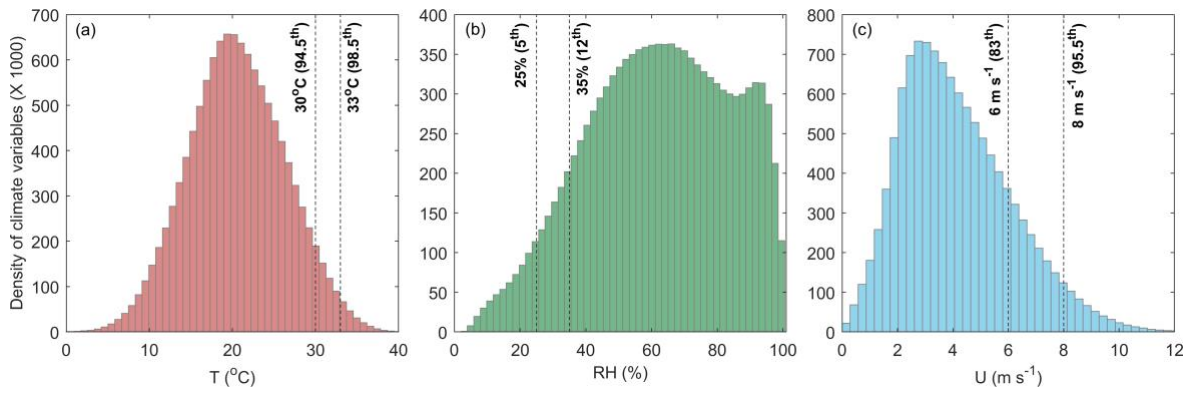

186 **Supplementary Figure 10. Distributions of (a) hourly temperature ( $T$ ,  $^{\circ}\text{C}$ ), (b) relative**  
 187 **humidity (RH, %), and (c) ambient wind speeds ( $U$ ,  $\text{m s}^{-1}$ ) during the heading to maturity**  
 188 **period across our study domain from 1982-2020. The black vertical dotted lines indicate the**  
 189 **percentiles in brackets and their corresponding values.**  
 190



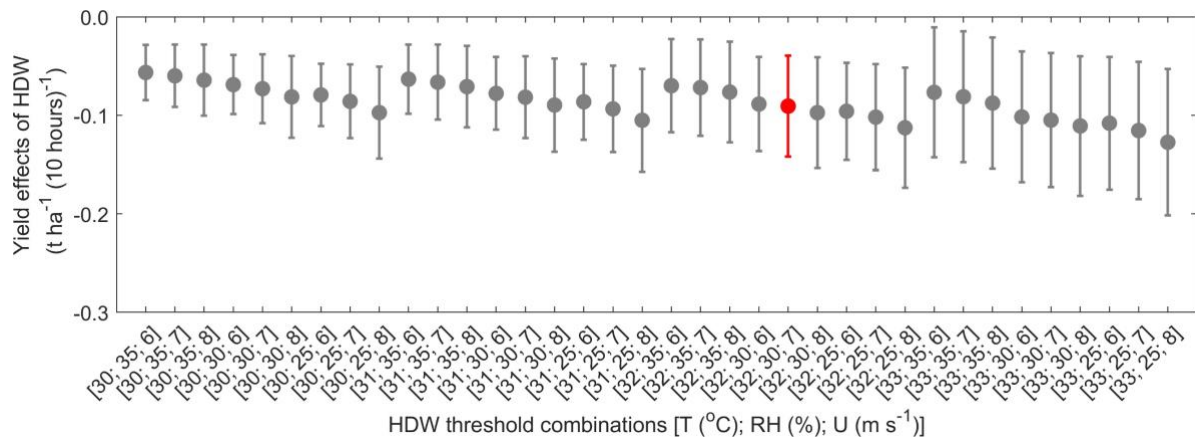

191 **Supplementary Figure 11. Yield sensitivity of hot-dry-windy (HDW) events from 1982 to**  
 192 **2020 estimated using the 36 combinations of the thresholds tested.** Red color indicates the  
 193 combination we used in the Main text. Numbers in the square brackets represent thresholds of  
 194 temperature (T), relative humidity (RH), and wind speeds (U), respectively. The error bars  
 195 indicate a 95% confidence interval.

196

197

198

199

(a) Temperature effects from M2 Model

(b) HDW effects from M0, M1, and M2

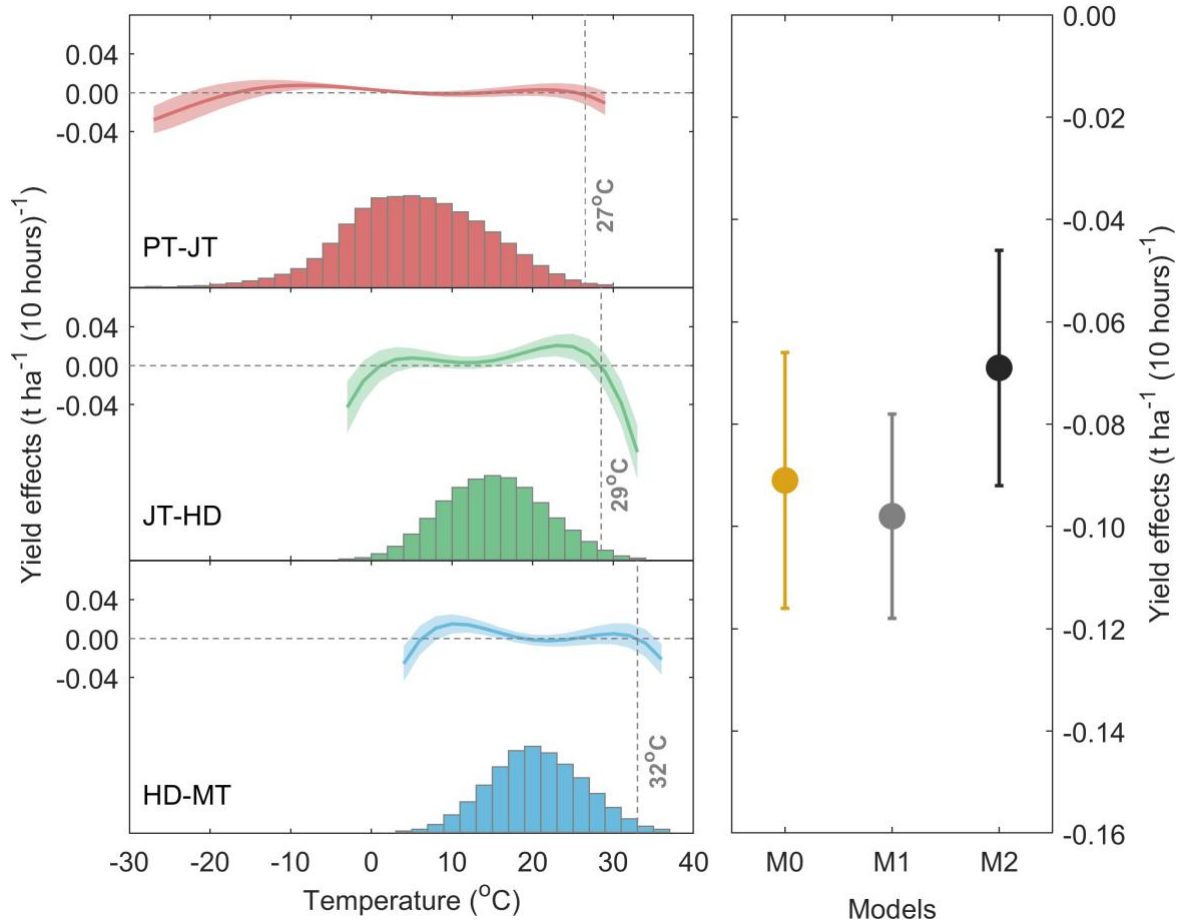

200 **Supplementary Figure 12. Yield sensitivity to temperature bins and hot-dry-windy**  
 201 **(HDW) effects tested in three models. a,** Yield sensitivity to temperature bins at three  
 202 phenological stages: planting to jointing (PT-JT; red); jointing to heading (JT-HD; green); and  
 203 heading to maturity (HD-MT; blue). Histograms show exposure times (hours) for each  
 204 phenological stage across county-years in 2°C temperature bins. The solid lines indicate the  
 205 mean yield effects per 10 hours of temperature bin, and the shaded regions around the solid  
 206 lines indicate the 95% confidence interval. Temperature “32°C” in the panel (blue) indicates  
 207 that yield would be lost when temperature is higher than this threshold. **b,** Yield effects (t ha<sup>-1</sup>  
 208 per 10 hours of HDW events) during the HD-MT stage using the original model (here called  
 209 M0, Eqs. 1 and 2 in Methods), the quadratic temperature model (M1, Eq. S1), and the  
 210 temperature bins’ model (M2, Eq. S2). Error bars show one clustering standard error (SE).

211

212 **Supplementary Tables (5)**

213 **Supplementary Table 1. Links of publicly available data for phenology.**

214

| <b>States</b> | <b>Links</b>                                                                                                                                                                                                                                                                                                                                                                                                                 |
|---------------|------------------------------------------------------------------------------------------------------------------------------------------------------------------------------------------------------------------------------------------------------------------------------------------------------------------------------------------------------------------------------------------------------------------------------|
| South Dakota  | <a href="https://extension.sdstate.edu/winter-wheat-variety-trial-results">https://extension.sdstate.edu/winter-wheat-variety-trial-results</a>                                                                                                                                                                                                                                                                              |
| Nebraska      | <a href="https://cropwatch.unl.edu/winter-wheat-variety-test-results">https://cropwatch.unl.edu/winter-wheat-variety-test-results</a><br><a href="https://digitalcommons.unl.edu/extensionhist/">https://digitalcommons.unl.edu/extensionhist/</a>                                                                                                                                                                           |
| Colorado      | <a href="https://agsci.colostate.edu/csucrops/winter-wheat-trial-results/#Wheat2011">https://agsci.colostate.edu/csucrops/winter-wheat-trial-results/#Wheat2011</a>                                                                                                                                                                                                                                                          |
| Kansas        | <a href="https://www.agronomy.k-state.edu/services/crop-performance-tests/winter-wheat/index.html">https://www.agronomy.k-state.edu/services/crop-performance-tests/winter-wheat/index.html</a>                                                                                                                                                                                                                              |
| Oklahoma      | <a href="http://croptrials.okstate.edu/wheat/grain-yield/">http://croptrials.okstate.edu/wheat/grain-yield/</a><br><a href="https://digitalprairie.ok.gov/digital/collection/stgovpub/id/23993">https://digitalprairie.ok.gov/digital/collection/stgovpub/id/23993</a><br><a href="https://www.okwheat.org/research-documents/variety-trials/">https://www.okwheat.org/research-documents/variety-trials/</a>                |
| Texas         | <a href="http://varietytesting.tamu.edu/wheat/">http://varietytesting.tamu.edu/wheat/</a><br><a href="https://www.ars.usda.gov/plains-area/lincoln-ne/wheat-sorghum-and-forage-research/docs/hard-winter-wheat-regional-nursery-program/pre-2010-nursery-data/">https://www.ars.usda.gov/plains-area/lincoln-ne/wheat-sorghum-and-forage-research/docs/hard-winter-wheat-regional-nursery-program/pre-2010-nursery-data/</a> |

215

216

217

218 **Supplementary Table 2. Parameter estimates from standardized modelling regression.**  
 219 **Standard errors (SEs) were clustered by county and year.**  
 220

| <b>Climate indices</b>         | <b><math>\beta</math></b> | <b>SEs</b> | <b>p<sub>adj</sub></b> |
|--------------------------------|---------------------------|------------|------------------------|
| Frez <sub>PPT-JT</sub>         | -0.026                    | 0.019      | 0.170                  |
| Frez <sub>JT-HD</sub>          | -0.029                    | 0.011      | 0.009                  |
| EDD <sub>JT-HD</sub>           | -0.052                    | 0.014      | <0.001                 |
| EDD <sub>HD-MT</sub>           | -0.017                    | 0.031      | 0.575                  |
| Prcp <sub>PPT-JT</sub>         | 0.500                     | 0.051      | <0.001                 |
| Prcp <sub>JT-HD</sub>          | 0.190                     | 0.044      | <0.001                 |
| Prcp <sub>HD-MT</sub>          | 0.062                     | 0.043      | 0.144                  |
| Prcp <sub>PPT-JT</sub> Squared | -0.383                    | 0.051      | <0.001                 |
| Prcp <sub>JT-HD</sub> Squared  | -0.173                    | 0.035      | <0.001                 |
| Prcp <sub>HD-MT</sub> Squared  | -0.118                    | 0.040      | 0.003                  |
| HDW <sub>HD-MT</sub>           | -0.083                    | 0.023      | <0.001                 |
| R-squared                      | 0.590                     |            |                        |
| p-value (F-test)               | <0.001                    |            |                        |

221

222

223  
224

**Supplementary Table 3. Parameter estimates from original modelling regression.**

| <b>Climate indices</b>                              | <b><math>\beta</math></b> | <b>SEs</b> | <b>p<sub>adj</sub></b> |
|-----------------------------------------------------|---------------------------|------------|------------------------|
| Frez <sub>PPT-JT</sub> (10 days)                    | -0.017                    | 0.012      | 0.161                  |
| Frez <sub>JT-HD</sub> (1 day)                       | -0.033                    | 0.013      | 0.013                  |
| EDD <sub>JT-HD</sub> (1 °C day)                     | -0.147                    | 0.038      | <0.001                 |
| EDD <sub>HD-MT</sub> (10 °C days)                   | -0.062                    | 0.107      | 0.564                  |
| Prcp <sub>PPT-JT</sub> (50 mm)                      | 0.214                     | 0.017      | <0.001                 |
| Prcp <sub>JT-HD</sub> (50 mm)                       | 0.189                     | 0.036      | <0.001                 |
| Prcp <sub>HD-MT</sub> (50 mm)                       | 0.041                     | 0.022      | 0.059                  |
| Prcp <sub>PPT-JT</sub> Squared (50 <sup>2</sup> mm) | -0.014                    | 0.002      | <0.001                 |
| Prcp <sub>JT-HD</sub> Squared (50 <sup>2</sup> mm)  | -0.039                    | 0.007      | <0.001                 |
| Prcp <sub>HD-MT</sub> Squared (50 <sup>2</sup> mm)  | -0.011                    | 0.003      | <0.001                 |
| HDW <sub>HD-MT</sub> (10 hours)                     | -0.091                    | 0.026      | <0.001                 |
| R-squared                                           | 0.590                     |            |                        |
| p-value (F-test)                                    | <0.001                    |            |                        |

225  
226

227 **Supplementary Table 4. Climate dataset links.**

228

| <b>Data sources</b>               | <b>Links</b>                                                                                                                                                                            |
|-----------------------------------|-----------------------------------------------------------------------------------------------------------------------------------------------------------------------------------------|
| ERA5-Land                         | <a href="https://cds.climate.copernicus.eu/cdsapp#!/dataset/reanalysis-era5-land?tab=overview">https://cds.climate.copernicus.eu/cdsapp#!/dataset/reanalysis-era5-land?tab=overview</a> |
| HadISD                            | <a href="http://www.metoffice.gov.uk/hadobs/hadisd/">http://www.metoffice.gov.uk/hadobs/hadisd/</a>                                                                                     |
| Pacific Decadal Oscillation (PDO) | <a href="https://psl.noaa.gov/pdo/">https://psl.noaa.gov/pdo/</a>                                                                                                                       |

229 **Note:** PDO data are calculated using the National Oceanic and Atmospheric Administration's Extended Reconstructed SST  
 230 data set, version 5 (ERSST.v5), on a 2° × 2° latitude-longitude grid.

231

232

233  
234

**Supplementary Table 5. Root mean square error (RMSE) for estimated planting (PT) and maturity (MT) dates across South Dakota, Colorado, Oklahoma, and Texas.**

| South Dakota |           |             |    | Colorado  |           |             |    |
|--------------|-----------|-------------|----|-----------|-----------|-------------|----|
| Locations    |           | RMSE (days) |    | Locations |           | RMSE (days) |    |
| Latitude     | Longitude | PT          | MT | Latitude  | Longitude | PT          | MT |
| 43.19°       | -99.19°   | 1           | 3  | 37.32°    | -102.56°  | 5           | 2  |
| 43.19°       | -100.72°  | 2           | 4  | 37.96°    | -103.07°  | 4           | 2  |
| 43.19°       | -101.66°  | 4           | 4  | 37.96°    | -102.39°  | 3           | 2  |
| 43.21°       | -98.59°   | 2           | 2  | 38.43°    | -102.74°  | 3           | 2  |
| 43.24°       | -103.53°  | 6           | 5  | 38.83°    | -102.60°  | 3           | 2  |
| 43.33°       | -97.75°   | 3           | 2  | 38.99°    | -103.51°  | 4           | 4  |
| 43.34°       | -102.55°  | 4           | 4  | 39.29°    | -104.14°  | 4           | 4  |
| 43.35°       | -99.88°   | 1           | 1  | 39.31°    | -102.60°  | 2           | 3  |
| 43.39°       | -98.37°   | 1           | 0  | 39.65°    | -104.34°  | 5           | 4  |
| 43.58°       | -100.76°  | 5           | 0  | 39.87°    | -104.34°  | 4           | 4  |
| 43.67°       | -98.15°   | 2           | 2  | 39.97°    | -103.20°  | 3           | 3  |
| 43.69°       | -101.63°  | 3           | 1  | 40.00°    | -102.42°  | 2           | 2  |
| 43.72°       | -98.56°   | 5           | 1  | 40.26°    | -103.81°  | 3           | 4  |
| 43.72°       | -99.08°   | 1           | 0  | 40.55°    | -104.39°  | 5           | 4  |
| 43.90°       | -99.85°   | 0           | 2  | 40.59°    | -102.36°  | 3           | 2  |
| 43.96°       | -100.69°  | 1           | 1  | 40.67°    | -105.46°  | 5           | 6  |
| 44.00°       | -102.82°  | 3           | 4  | 40.72°    | -103.11°  | 2           | 3  |
| 44.07°       | -98.63°   | 4           | 1  | 40.88°    | -102.35°  | 4           | 3  |
| 44.08°       | -99.20°   | 3           | 0  |           |           |             |    |
| 44.29°       | -101.54°  | 0           | 1  |           |           |             |    |
| 44.37°       | -97.49°   | 0           | 2  |           |           |             |    |
| 44.39°       | -100.00°  | 0           | 0  |           |           |             |    |
| 44.41°       | -100.74°  | 0           | 1  |           |           |             |    |
| 44.41°       | -98.28°   | 1           | 1  |           |           |             |    |
| 44.55°       | -99.49°   | 1           | 2  |           |           |             |    |
| 44.55°       | -99.00°   | 1           | 4  |           |           |             |    |
| 44.57°       | -102.72°  | 0           | 2  |           |           |             |    |
| 44.72°       | -100.13°  | 0           | 1  |           |           |             |    |
| 44.86°       | -97.73°   | 2           | 1  |           |           |             |    |
| 44.91°       | -103.51°  | 2           | 4  |           |           |             |    |
| 44.94°       | -98.35°   | 1           | 1  |           |           |             |    |
| 44.98°       | -101.67°  | 2           | 1  |           |           |             |    |
| 45.06°       | -99.96°   | 0           | 0  |           |           |             |    |
| 45.07°       | -99.15°   | 0           | 3  |           |           |             |    |
| 45.16°       | -100.87°  | 3           | 1  |           |           |             |    |
| 45.42°       | -99.22°   | 1           | 2  |           |           |             |    |
| 45.43°       | -100.03°  | 3           | 1  |           |           |             |    |
| 45.49°       | -102.48°  | 2           | 3  |           |           |             |    |
| 45.71°       | -101.20°  | 1           | 4  |           |           |             |    |

235

236 **Supplementary Table 5. Continued.**

| Oklahoma  |           |             |    | Texas     |           |             |    |
|-----------|-----------|-------------|----|-----------|-----------|-------------|----|
| Locations |           | RMSE (days) |    | Locations |           | RMSE (days) |    |
| Latitude  | Longitude | PT          | MT | Latitude  | Longitude | PT          | MT |
| 33.96°    | -96.26°   | 9           | 6  | 28.87°    | -99.76°   | 3           | 5  |
| 34.11°    | -97.84°   | 9           | 6  | 28.87°    | -99.11°   | 4           | 4  |
| 34.29°    | -98.37°   | 9           | 5  | 29.36°    | -99.11°   | 2           | 4  |
| 34.37°    | -98.92°   | 10          | 4  | 29.36°    | -99.76°   | 6           | 5  |
| 34.49°    | -97.85°   | 7           | 6  | 29.45°    | -98.52°   | 3           | 4  |
| 34.59°    | -99.41°   | 8           | 5  | 29.58°    | -97.95°   | 3           | 4  |
| 34.66°    | -98.47°   | 8           | 3  | 30.65°    | -97.60°   | 5           | 4  |
| 34.70°    | -97.31°   | 5           | 4  | 30.79°    | -96.98°   | 4           | 4  |
| 34.74°    | -99.85°   | 7           | 5  | 31.04°    | -97.48°   | 5           | 4  |
| 34.92°    | -98.98°   | 7           | 3  | 31.16°    | -98.82°   | 4           | 5  |
| 34.94°    | -99.56°   | 6           | 4  | 31.20°    | -99.35°   | 6           | 6  |
| 35.01°    | -97.44°   | 4           | 4  | 31.25°    | -96.94°   | 2           | 4  |
| 35.02°    | -97.88°   | 5           | 4  | 31.33°    | -99.86°   | 5           | 6  |
| 35.17°    | -98.38°   | 5           | 3  | 31.39°    | -97.80°   | 5           | 5  |
| 35.20°    | -97.33°   | 5           | 5  | 31.40°    | -100.46°  | 7           | 4  |
| 35.21°    | -96.95°   | 5           | 4  | 31.55°    | -97.20°   | 2           | 4  |
| 35.27°    | -99.68°   | 5           | 4  | 31.70°    | -98.11°   | 5           | 5  |
| 35.29°    | -98.99°   | 6           | 4  | 31.77°    | -99.45°   | 6           | 5  |
| 35.54°    | -97.98°   | 6           | 5  | 31.83°    | -99.98°   | 5           | 6  |
| 35.55°    | -97.41°   | 8           | 5  | 31.90°    | -97.63°   | 5           | 5  |
| 35.62°    | -95.38°   | 11          | 7  | 31.99°    | -97.13°   | 5           | 3  |
| 35.64°    | -99.00°   | 4           | 3  | 32.05°    | -96.47°   | 5           | 3  |
| 35.69°    | -99.70°   | 6           | 3  | 32.30°    | -99.37°   | 8           | 5  |
| 35.88°    | -98.43°   | 4           | 4  | 32.30°    | -99.89°   | 9           | 5  |
| 35.92°    | -97.44°   | 7           | 3  | 32.30°    | -100.41°  | 6           | 7  |
| 35.95°    | -97.94°   | 5           | 4  | 32.35°    | -96.79°   | 6           | 3  |
| 35.96°    | -95.52°   | 9           | 5  | 32.38°    | -97.37°   | 6           | 3  |
| 35.99°    | -99.01°   | 4           | 3  | 32.60°    | -96.29°   | 6           | 4  |
| 36.08°    | -96.98°   | 7           | 5  | 32.74°    | -99.35°   | 8           | 5  |
| 36.22°    | -99.75°   | 5           | 3  | 32.74°    | -99.88°   | 9           | 5  |
| 36.30°    | -95.23°   | 9           | 5  | 32.74°    | -102.64°  | 10          | 7  |
| 36.31°    | -98.54°   | 4           | 4  | 32.74°    | -100.40°  | 9           | 7  |
| 36.32°    | -96.70°   | 7           | 4  | 32.77°    | -96.78°   | 7           | 3  |
| 36.37°    | -95.60°   | 8           | 5  | 33.12°    | -96.09°   | 10          | 4  |
| 36.38°    | -97.78°   | 4           | 4  | 33.17°    | -102.34°  | 10          | 7  |
| 36.39°    | -97.23°   | 6           | 5  | 33.18°    | -98.69°   | 10          | 4  |
| 36.42°    | -99.26°   | 4           | 3  | 33.18°    | -99.21°   | 7           | 5  |
| 36.63°    | -96.40°   | 6           | 5  | 33.18°    | -99.73°   | 7           | 5  |
| 36.72°    | -95.90°   | 8           | 5  | 33.18°    | -100.25°  | 8           | 7  |
| 36.73°    | -98.32°   | 7           | 5  | 33.19°    | -96.57°   | 8           | 4  |
| 36.75°    | -101.49°  | 3           | 4  | 33.21°    | -97.12°   | 8           | 4  |
| 36.75°    | -102.52°  | 4           | 7  | 33.39°    | -95.67°   | 10          | 4  |
| 36.75°    | -100.48°  | 3           | 3  | 33.59°    | -96.11°   | 7           | 4  |
| 36.76°    | -95.21°   | 6           | 5  | 33.60°    | -102.83°  | 9           | 7  |
| 36.77°    | -98.87°   | 4           | 4  | 33.61°    | -99.74°   | 7           | 5  |
| 36.79°    | -99.67°   | 5           | 3  | 33.61°    | -101.82°  | 11          | 7  |
| 36.80°    | -97.79°   | 3           | 5  | 33.61°    | -101.30°  | 9           | 7  |
| 36.82°    | -97.14°   | 6           | 4  | 33.62°    | -98.69°   | 8           | 4  |
| 36.84°    | -94.81°   | 7           | 5  | 33.62°    | -99.21°   | 7           | 5  |

237

238

239

240



241 **Supplementary Table 5. Continued.**

| Texas     |           |             |    | Texas     |           |             |    |
|-----------|-----------|-------------|----|-----------|-----------|-------------|----|
| Locations |           | RMSE (days) |    | Locations |           | RMSE (days) |    |
| Latitude  | Longitude | PT          | MT | Latitude  | Longitude | PT          | MT |
| 33.62°    | -100.78°  | 9           | 7  | 34.96°    | -100.27°  | 10          | 7  |
| 33.63°    | -96.68°   | 9           | 4  | 34.96°    | -101.36°  | 3           | 7  |
| 33.64°    | -97.21°   | 10          | 4  | 34.97°    | -101.90°  | 4           | 7  |
| 33.67°    | -95.57°   | 11          | 4  | 34.97°    | -102.60°  | 7           | 7  |
| 33.68°    | -97.72°   | 11          | 5  | 35.40°    | -100.81°  | 5           | 7  |
| 33.79°    | -98.21°   | 10          | 5  | 35.40°    | -100.27°  | 11          | 8  |
| 33.97°    | -99.78°   | 7           | 4  | 35.40°    | -101.89°  | 4           | 7  |
| 33.99°    | -98.70°   | 10          | 4  | 35.40°    | -101.35°  | 2           | 7  |
| 34.07°    | -102.83°  | 7           | 7  | 35.41°    | -102.60°  | 6           | 7  |
| 34.07°    | -102.35°  | 11          | 7  | 35.84°    | -100.27°  | 6           | 8  |
| 34.07°    | -101.83°  | 11          | 7  | 35.84°    | -101.89°  | 6           | 7  |
| 34.07°    | -101.30°  | 8           | 7  | 35.84°    | -100.81°  | 5           | 7  |
| 34.08°    | -100.28°  | 5           | 7  | 35.84°    | -101.35°  | 4           | 7  |
| 34.08°    | -99.24°   | 7           | 4  | 35.84°    | -102.60°  | 8           | 7  |
| 34.29°    | -99.75°   | 6           | 5  | 36.28°    | -101.35°  | 6           | 7  |
| 34.53°    | -100.21°  | 7           | 7  | 36.28°    | -101.89°  | 9           | 7  |
| 34.53°    | -102.26°  | 7           | 7  | 36.28°    | -100.27°  | 8           | 8  |
| 34.53°    | -102.78°  | 5           | 7  | 36.28°    | -102.60°  | 11          | 7  |
| 34.53°    | -101.21°  | 11          | 7  | 36.28°    | -100.82°  | 6           | 8  |
| 34.53°    | -101.74°  | 8           | 7  |           |           |             |    |

242  
243  
244  
245  
246  
247  
248  
249  
250  
251  
252  
253  
254  
255  
256  
257  
258  
259  
260  
261  
262

Supplementary References

263  
264  
265  
266  
267  
268  
269  
270  
271  
272  
273  
274  
275  
276  
277  
278  
279  
280  
281  
282  
283  
284  
285  
286  
287  
288  
289  
290

1. Barber, C. B., Dobkin, D. P. & Huhdanpaa, H. The quickhull algorithm for convex hulls. *ACM Trans. Math. Softw.* **22**, 469-483 (1996).
2. Vehtari, A., Gelman, A. & Gabry, J. Practical Bayesian model evaluation using leave-one-out cross-validation and WAIC. *Stat. Comput.* **27**, 1413-1432 (2017).
3. Robertson, D. L. G., S.O.; Brown, B.D. Southern Idaho Dryland Winter Wheat Production Guide. (University of Idaho: Moscow, ID, USA, 2004).
4. Peairs, F., & Armenta, R. Wheat Production and Pest Management for the Great Plains Region. (Colorado State University Extension, 2010).
5. Lobell, D. B., Sibley, A. & Ortiz-Monasterio, J. I. Extreme heat effects on wheat senescence in India. *Nat. Clim. Change* **2**, 186-189 (2012).
6. Dunn, R. J., Willett, K. M., Parker, D. E. & Mitchell, L. Expanding HadISD: Quality-controlled, sub-daily station data from 1931. *Geosci. Instrum. Methods Data Syst.* **5**, 473-491 (2016).
7. Schneider, T. Analysis of incomplete climate data: Estimation of mean values and covariance matrices and imputation of missing values. *J. Clim.* **14**, 853-871 (2001).
8. Lobell, D. B., Schlenker, W. & Costa-Roberts, J. Climate trends and global crop production since 1980. *Science* **333**, 616-620 (2011).
